# Supplementary material
Source: Springer Nature journal article supplement (https://www.springermedizin.de/resource/supplementary/12872_2014_703_MOESM3_ESM.pdf/9430684)
Supplement: MOESM3 [file 9430684]

**Clinically Apparent**

**Clinically Apparent (subtle)  
but often undetected**

**Clinically Silent**

**Cerebrovascular Events (CVEs)**

**Major / Disabling Stroke**

**Minor / Non-disabling Stroke**

**Transient Ischemic Attack (TIA)**

**Silent Brain Infarction (SBI)**

**Neurocognitive Dysfunction**

**Postoperative Cognitive Dysfunction (POCD)**

**Postoperative Delirium (POD)**
